# Supplementary material for: Inferential Structure Determination of Chromosomes from Single-Cell Hi-C Data
Source: PubMed Central journal article supplement (PMC5226817; doi:10.1371/journal.pcbi.1005292), 2016-12-27
Supplement: pcbi.1005292.s002.pdf [file pcbi.1005292.s002.pdf]

## Estimated model evidence

| Prior probability        | model evidence | model evidence per data point |
|--------------------------|----------------|-------------------------------|
| Quartic repulsion        | -2489          | -5.68                         |
| Quartic repulsion + FISH | -2363          | -5.39                         |
| Lennard-Jones            | -1950          | -4.45                         |
| Lennard-Jones + FISH     | -1859          | -4.24                         |

Table S1: Model evidence based on contact likelihood.
