# Supplementary material for: Inferential Structure Determination of Chromosomes from Single-Cell Hi-C Data
Source: PubMed Central journal article supplement (PMC5226817; doi:10.1371/journal.pcbi.1005292), 2016-12-27
Supplement: pcbi.1005292.s005.pdf [file pcbi.1005292.s005.pdf]

## Supplementary Appendix

### Full inference of distance-based models

Bayesian inference also allows us to estimate both parameters,  $\gamma$  and  $\sigma$ , simultaneously. The ensemble obtained with free parameters appears to be the blurred version of the ensemble with fixed data weight (see Fig. A1 for a comparison of the average distance matrices). The parameters of the lognormal model are shown in Figure A2. Both  $\gamma$  and the weight  $w = 1/\sigma^2$  are estimated to be smaller compared to the values obtained with fixed  $w$ . Figure A3 shows a comparison of the energies, log likelihoods, radii of gyration and other quantities for the simulation with fixed and variable  $\sigma$ .

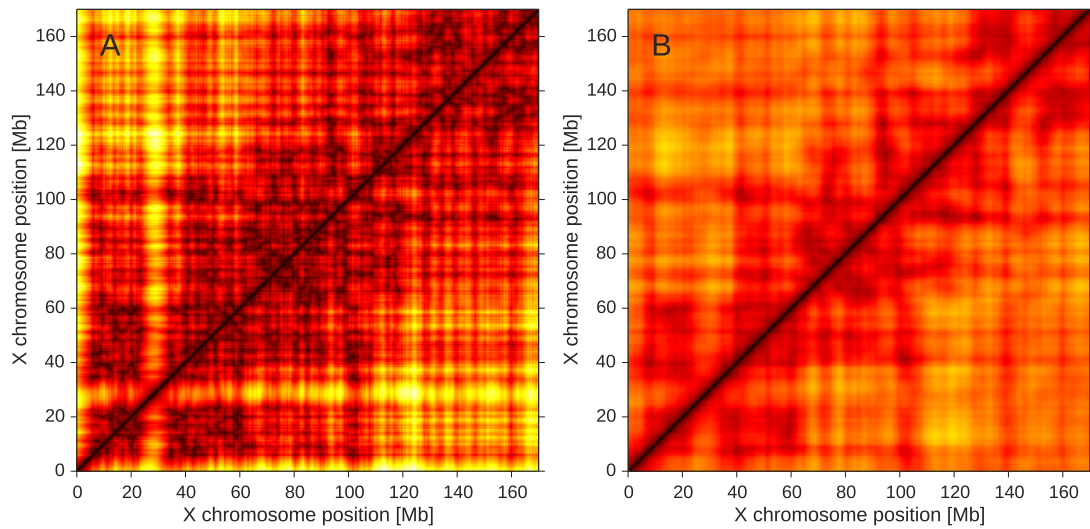

Fig A1: Comparison of distance-based structure ensembles assuming a lognormal error model. **(A)** Average distance matrix with fixed data weight  $w = \sigma^{-2} = 500$ . **(B)** Average distance matrix with free  $w = \sigma^{-2}$  and distance scale  $\gamma$ .

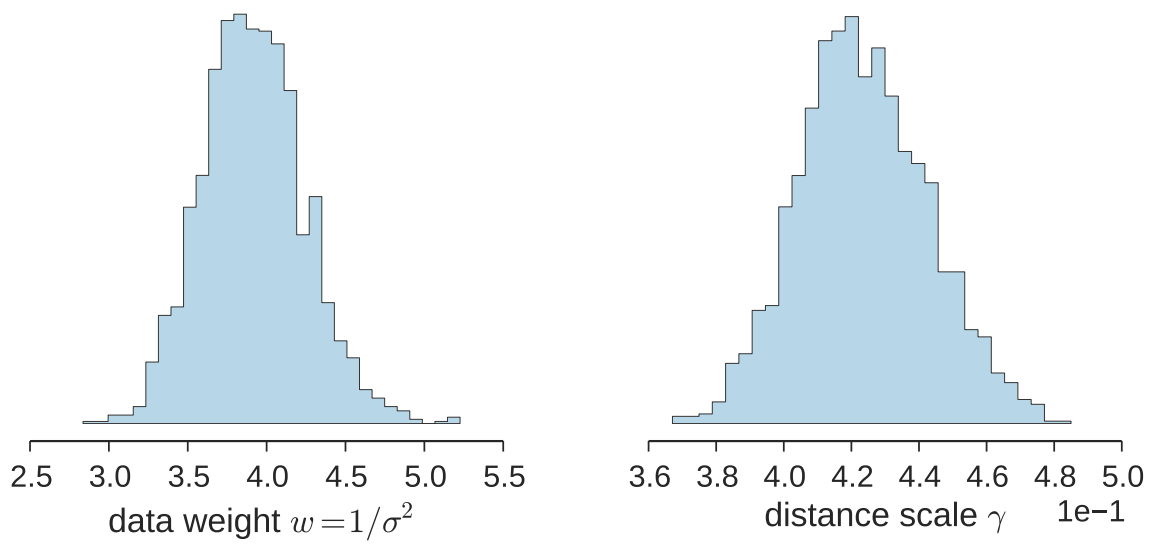

Fig A2: Estimated model parameters for the lognormal model.

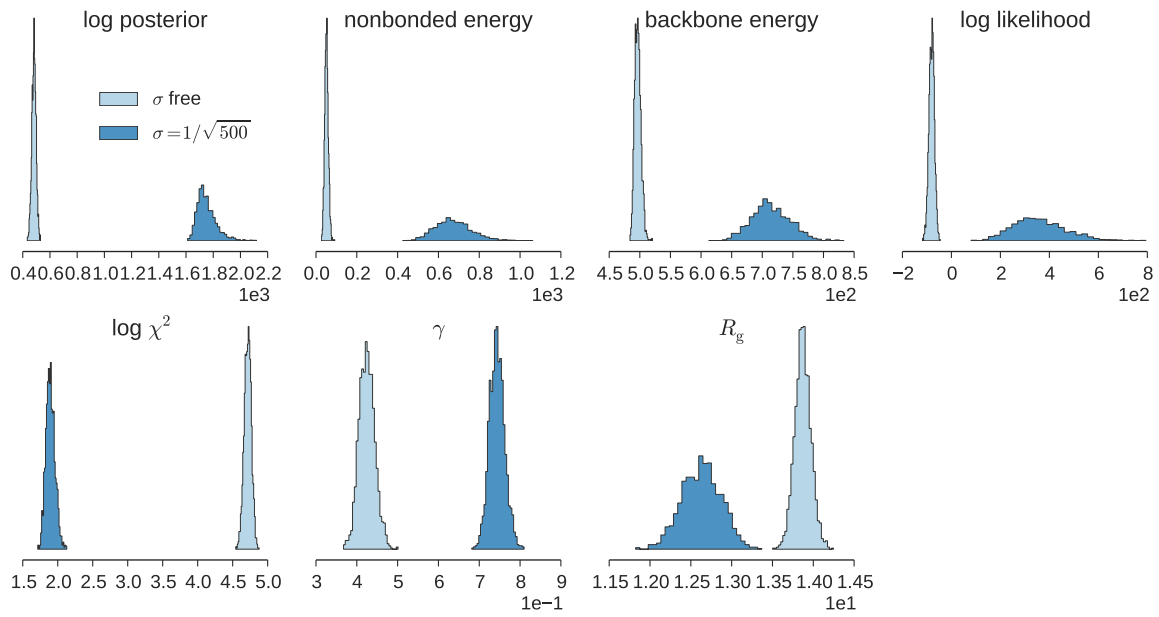

Fig A3: Comparison of ensembles calculated with fixed and variable data weight  $\sigma^{-2}$ .
