# Supplementary material for: Inferential Structure Determination of Chromosomes from Single-Cell Hi-C Data
Source: PubMed Central journal article supplement (PMC5226817; doi:10.1371/journal.pcbi.1005292), 2016-12-27
Supplement: pcbi.1005292.s008.pdf [file pcbi.1005292.s008.pdf]

## Correlation between average distance matrices

|        | cell 1      | cell 2      | cell 3      | cell 4      | cell 5      | cell 6      |
|--------|-------------|-------------|-------------|-------------|-------------|-------------|
| cell 1 | <b>85.2</b> | 49.5        | 57.5        | 58.2        | 47.6        | 49.9        |
| cell 2 | 46.2        | <b>92.1</b> | 52.2        | 51.0        | 40.9        | 37.5        |
| cell 3 | 54.0        | 46.7        | <b>91.5</b> | 49.5        | 51.0        | 43.0        |
| cell 4 | 55.1        | 45.5        | 45.4        | <b>91.1</b> | 46.8        | 45.1        |
| cell 5 | 44.5        | 36.0        | 46.2        | 42.5        | <b>70.6</b> | 33.5        |
| cell 6 | 50.2        | 33.2        | 42.5        | 44.1        | 36.3        | <b>91.3</b> |

Table S2: Comparison of distance matrices. Shown are the correlation coefficients between the average distance matrices (in %) for structure ensembles obtained from cell 1 to cell 6. Lower diagonal: ISD ensemble vs ISD ensemble. Upper diagonal: ISD ensemble vs ensemble by Nagano *et al.* Diagonal (shown in bold face): ISD ensemble vs ensemble by Nagano *et al.*
