# Supplementary material for: Inferential Structure Determination of Chromosomes from Single-Cell Hi-C Data
Source: PubMed Central journal article supplement (PMC5226817; doi:10.1371/journal.pcbi.1005292), 2016-12-27
Supplement: pcbi.1005292.s009.pdf [file pcbi.1005292.s009.pdf]

### Violations of restraints from six different cells

|                          | restraints from |            |            |            |            |            |
|--------------------------|-----------------|------------|------------|------------|------------|------------|
|                          | cell 1          | cell 2     | cell 3     | cell 4     | cell 5     | cell 6     |
| ensemble based on cell 1 | <b>0.0</b>      | 64.5       | 73.2       | 71.1       | 69.8       | 69.0       |
| cell 2                   | 73.2            | <b>0.0</b> | 74.5       | 79.6       | 70.8       | 71.0       |
| cell 3                   | 75.5            | 68.9       | <b>0.0</b> | 79.0       | 70.3       | 69.1       |
| cell 4                   | 70.6            | 65.2       | 73.7       | <b>0.0</b> | 68.8       | 69.6       |
| cell 5                   | 73.4            | 68.8       | 72.5       | 79.3       | <b>0.0</b> | 71.7       |
| cell 6                   | 76.1            | 68.3       | 77.6       | 79.1       | 72.1       | <b>0.0</b> |

Table S3: Percentage of restraints from different cells (columns) that are violated in structure ensembles (rows) with a tolerance of  $a/8$ .
