# Supplementary material for: Inferential Structure Determination of Chromosomes from Single-Cell Hi-C Data
Source: PubMed Central journal article supplement (PMC5226817; doi:10.1371/journal.pcbi.1005292), 2016-12-27

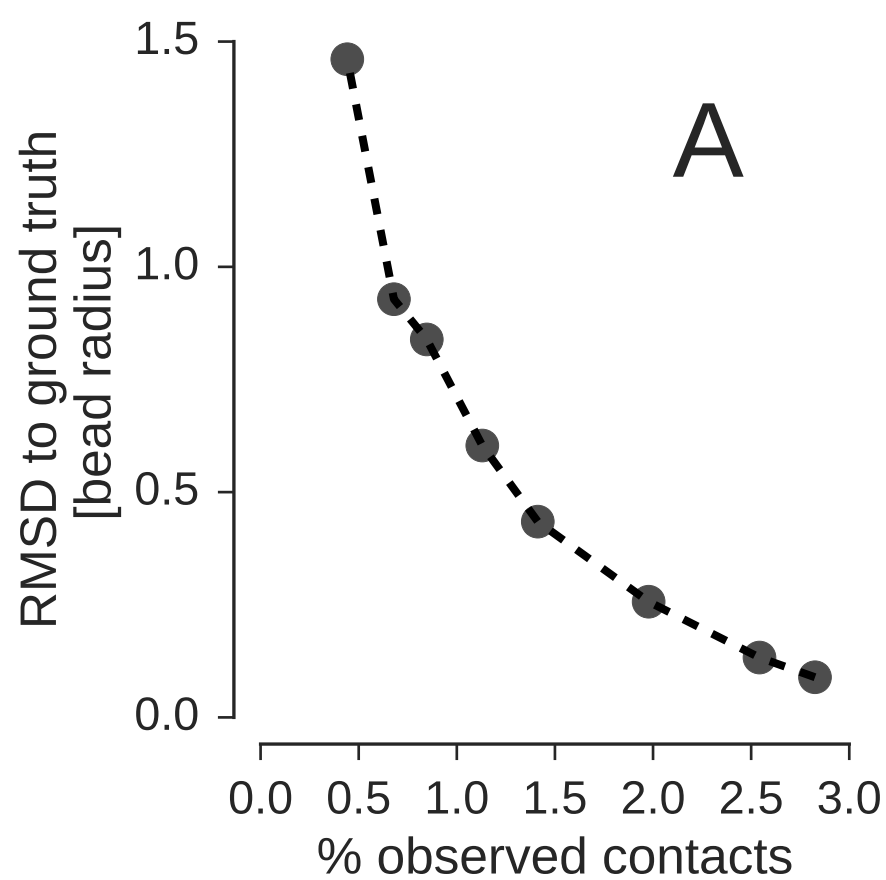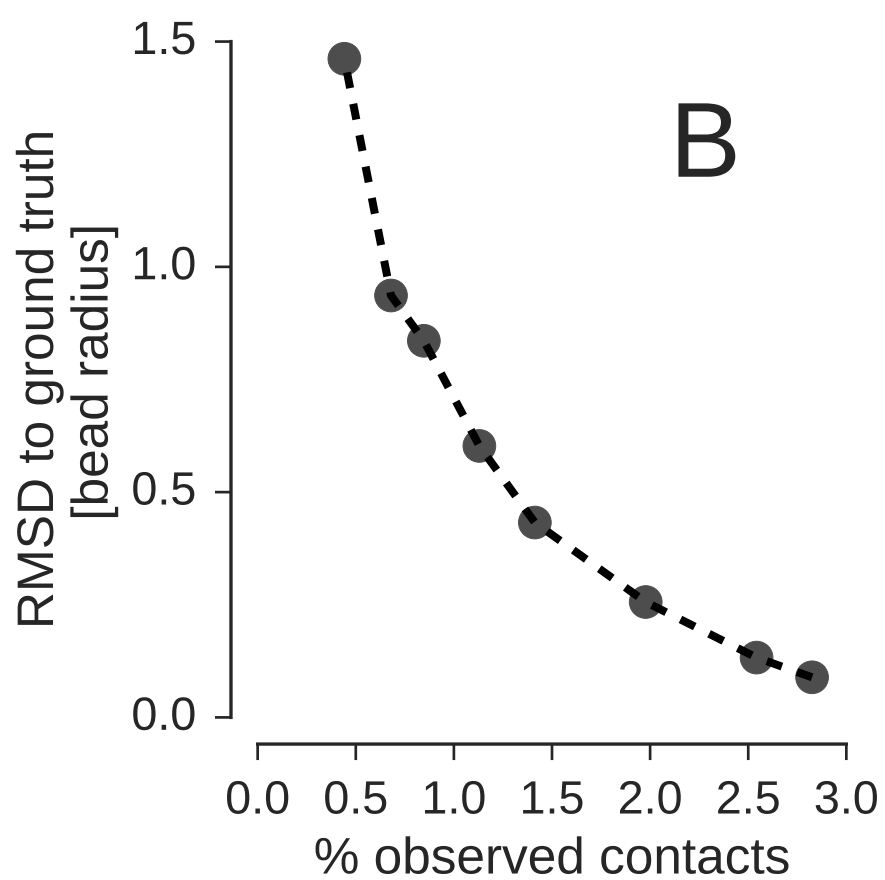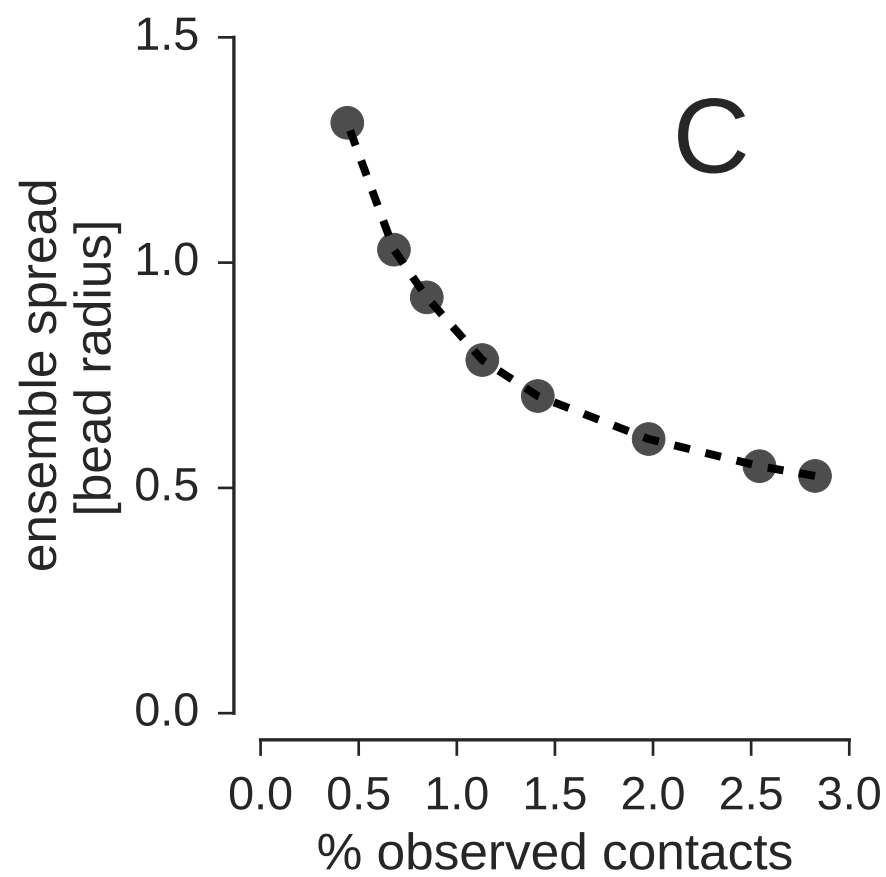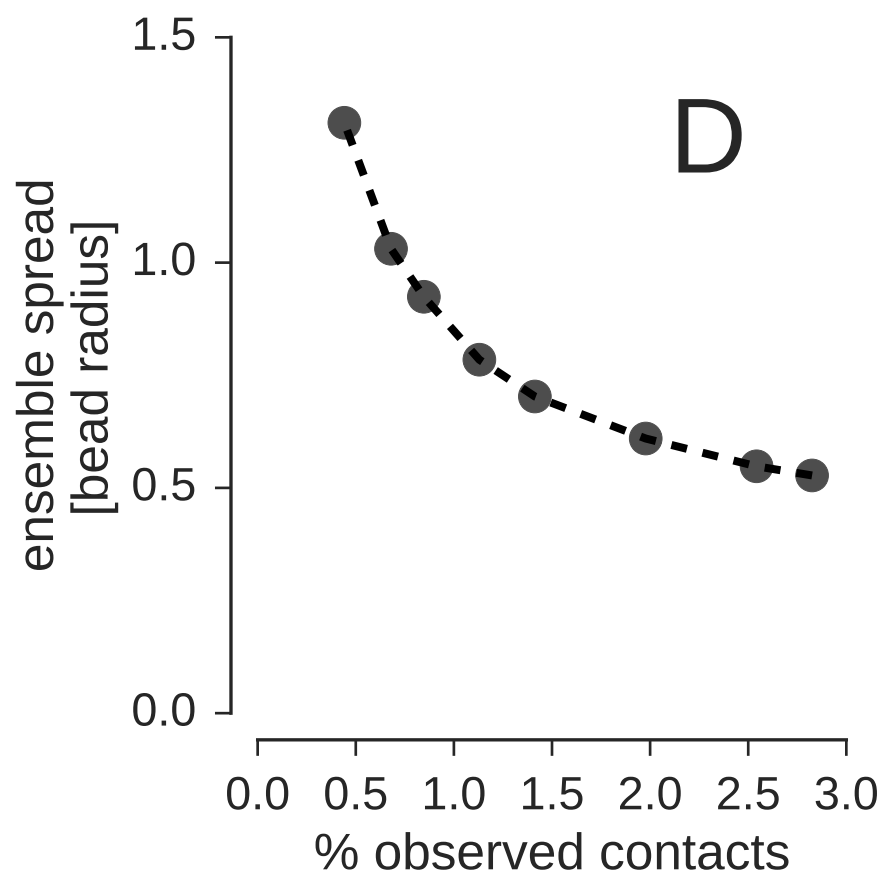

Supplement: pcbi.1005292.s016.pdf [file pcbi.1005292.s016.pdf]
